# Supplementary material
Source: Springer Nature journal article supplement (https://www.springermedizin.de/resource/supplementary/13195_2014_192_MOESM1_ESM.pdf/9688452)
Supplement: MOESM1 [file 9688452]

## Active immunotherapy

A $\beta$  fragments

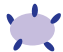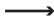

Immunization

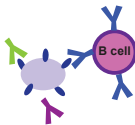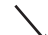

A $\beta$  antibody

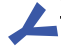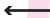

Blood

BBB

CNS

A $\beta$



A $\beta$



A $\beta$  deposits (plaque)

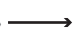

Reduced neuropathology and cognitive dysfunction

## Passive immunotherapy

mAb to portion of A $\beta$

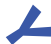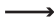

Antibody administration

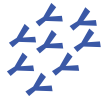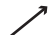

Blood

BBB

CNS

A $\beta$



A $\beta$



A $\beta$  deposits (plaque)



Reduced neuropathology and cognitive dysfunction

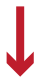

Clearance from brain and proteolysis
